# Supplementary material for: Simultaneous determination of aflatoxin B1 and zearalenone by magnetic nanoparticle filled amino-modified multi-walled carbon nanotubes
Source: Royal Society of Chemistry journal article supplement (doi:10.1039/c8ay00815a), 2018-01-01
Supplement: c8ay00815a1.pdf [file c8ay00815a1.pdf]

## **Supporting Information**

### **Simultaneous determination of aflatoxin B1 and zearalenone by magnetic nanoparticles filled amino-modified multi-walled carbon nanotubes**

Wen-kui Li,<sup>1,2</sup> Hai-xia Zhang,<sup>3</sup> Yan-ping Shi\*<sup>1</sup>

<sup>1</sup> CAS Key Laboratory of Chemistry of Northwestern Plant Resources and Key Laboratory for Natural Medicine of Gansu Province, Lanzhou Institute of Chemical Physics, Chinese Academy of Sciences, Lanzhou 730000, PR China

<sup>2</sup> University of Chinese Academy of Sciences, Beijing 100039, PR China

<sup>3</sup> College of Chemistry and Chemical Engineering, Lanzhou University, Lanzhou 730000, PR China

**Table S1** Fitting results of isotherms for AFB1 and ZON simultaneous adsorption

| Analytes | Langmuir model                  |       |           | Freundlich model                |       | Dubinin-Ashtakhov model                 |       |           |
|----------|---------------------------------|-------|-----------|---------------------------------|-------|-----------------------------------------|-------|-----------|
|          | $C_e/q_e = C_e/Q^0 + 1/K_L Q^0$ |       |           | $\lg q_e = \lg K_F + \lg C_e/n$ |       | $\lg q_e = \lg Q^0 - (\varepsilon/E)^b$ |       |           |
|          | $K_L$                           | $r^2$ | $Q^0$     | $n$                             | $r^2$ | $b$                                     | $r^2$ | $Q^0$     |
| AFB1     | 3.83±0.21                       | 0.979 | 5.60±0.26 | 1.35±0.12                       | 0.984 | 4.31±0.25                               | 0.994 | 6.46±0.22 |
| ZON      | 0.13±0.06                       | 0.672 | 9.31±0.38 | 1.12±0.08                       | 0.988 | 1.79±0.13                               | 0.994 | 5.79±0.18 |

$C_e$  [mg/L]: the concentration of analyte at equilibrium;  $q_e$  [mg/g]: the adsorbed analyte amount at equilibrium;  $Q^0$  [mg/g]: the maximum adsorption capacity of the adsorbent;  $K_L$  [L/mg]: the affinity coefficient;  $K_F$  [(mg/g)/(mg/L)<sup>n</sup>]: Freundlich affinity coefficient;  $n$ : Freundlich exponential coefficient;  $\varepsilon = RT \ln(C_s/C_e)$ ,  $\varepsilon$  [kJ/mol]: the effective adsorption potential;  $C_s$  [mg/L]: the water solubility of the analyte;  $E$  [kJ/mol]: the “correlating divisor”;  $b$ : fitting parameter.

**Table S2** Fitting results of kinetic models for AFB1 and ZON simultaneous adsorption

| Analytes | Pseudo-first-order model                   |       | Pseudo-second-order model     |       | Parabolic diffusion model     |       |
|----------|--------------------------------------------|-------|-------------------------------|-------|-------------------------------|-------|
|          | $\lg(q_e - q_t) = \lg q_e - k_1 t / 2.303$ |       | $t/q_t = 1/k_2 q_e^2 + t/q_e$ |       | $q_t/q_e t = k_3 t^{0.5} + a$ |       |
|          | $k_1$                                      | $r^2$ | $k_2$                         | $r^2$ | $k_3$                         | $r^2$ |
| AFB1     | 0.244±0.006                                | 0.820 | 0.705±0.18                    | 0.999 | -0.045±0.002                  | 0.843 |
| ZON      | 0.370±0.004                                | 0.780 | 0.429±0.13                    | 0.999 | -0.042±0.003                  | 0.849 |

$q_t$  (mg/g): the amount of the adsorbed analyte at certain time  $t$ ;  $k_1$  [g/(mg min)]: the rate constant of the pseudo-first-order model;  $k_2$  [g/(mg min)]: the rate constant of the pseudo-second-order model;  $k_3$ : the overall diffusion constant for adsorption.

**Table S3** The penalty points (PPs) for AFB1 and ZON determination in wheat flour by HPLC-DAD

| Reagents                             |                |
|--------------------------------------|----------------|
|                                      | Penalty points |
| Methanol (>100 mL)                   | 3              |
| Acetone: 0.2 mL                      | 1              |
| AFB1 and ZON standard solutions      | 4              |
|                                      | $\Sigma$ 8     |
| Instruments                          |                |
|                                      | Penalty points |
| HPLC-DAD                             | 1              |
| Occupational hazard                  | 0              |
| Waste                                | 2              |
|                                      | $\Sigma$ 3     |
| Total penalty points: 11             |                |
| Analytical Eco-Scale total score: 89 |                |
